# Supplementary material for: Comparison of Three Quality of Life Instruments in Lymphatic Filariasis: DLQI, WHODAS 2.0, and LFSQQ
Source: PubMed Central journal article supplement (PMC3930502; doi:10.1371/journal.pntd.0002716), 2014-02-20
Supplement: pntd.0002716.s002.pdf [file pntd.0002716.s002.pdf]

**LYMPHATIC FILARIASIS SPECIFIC QUALITY OF LIFE QUESTIONNAIRE (LFSQQ)**

**Instructions:** By placing a tick in each group below, please indicate which statement best describes patient's health state in last 30 days (Do not tick more than one box in each group)

How do you rate your overall health in the past 30 Days?

| <b>MOBILITY</b>                       |            |      |          |        |             |
|---------------------------------------|------------|------|----------|--------|-------------|
| <b>Domains of Indian life style</b>   | No problem | Mild | Moderate | Severe | Most severe |
| Sitting & getting out of a chair      |            |      |          |        |             |
| Sitting down & standing up from floor |            |      |          |        |             |
| Standing a long time                  |            |      |          |        |             |
| Lying down over the cot               |            |      |          |        |             |
| Climbing the steps                    |            |      |          |        |             |
| Putting on foot wear                  |            |      |          |        |             |
| Walking a long distance               |            |      |          |        |             |
| Traveling by Indian public transport  |            |      |          |        |             |

| <b>SELF CARE</b>                    |            |      |          |        |             |
|-------------------------------------|------------|------|----------|--------|-------------|
| <b>Domains of Indian life style</b> | No problem | Mild | Moderate | Severe | Most severe |
| Dressing yourself                   |            |      |          |        |             |
| Bathing                             |            |      |          |        |             |
| Washing clothes yourself            |            |      |          |        |             |
| Difficulty in Using Indian toilet   |            |      |          |        |             |
| Difficulty in Using European toilet |            |      |          |        |             |

| <b>USUAL ACTIVITIES</b>                                |            |      |          |        |             |
|--------------------------------------------------------|------------|------|----------|--------|-------------|
| <b>Domains of Indian life style</b>                    | No problem | Mild | Moderate | Severe | Most severe |
| Problems in cooking                                    |            |      |          |        |             |
| Difficulty in cleaning the floors                      |            |      |          |        |             |
| Difficulty in gardening                                |            |      |          |        |             |
| Difficulty in doing agrarian work                      |            |      |          |        |             |
| Difficulty in continuing the normal leisure activities |            |      |          |        |             |
| Difficulty in continuing the job                       |            |      |          |        |             |
| Difficulty in continuing the education.                |            |      |          |        |             |

| <b>DISEASE BURDEN</b>                                                       |            |      |          |        |             |
|-----------------------------------------------------------------------------|------------|------|----------|--------|-------------|
| <b>Domains of Indian life style</b>                                         | No problem | Mild | Moderate | Severe | Most severe |
| History of painful redness, swelling and cellulitis of leg (filarial fever) |            |      |          |        |             |
| Foul smell (odour)                                                          |            |      |          |        |             |
| Itching (Eczema/Discharge from limb)                                        |            |      |          |        |             |
| Wound (non-healing ulcer)                                                   |            |      |          |        |             |
| Weight/size of the limb                                                     |            |      |          |        |             |

| <b>PAIN / DISCOMFORT</b>                |            |      |          |        |             |
|-----------------------------------------|------------|------|----------|--------|-------------|
| <b>Domains of Indian life style</b>     | No problem | Mild | Moderate | Severe | Most severe |
| Pain increases at night                 |            |      |          |        |             |
| Pain increases during the day           |            |      |          |        |             |
| Pain increases while walking            |            |      |          |        |             |
| Pain increases while sitting            |            |      |          |        |             |
| Pain in the joints                      |            |      |          |        |             |
| Pain in the unaffected part of the body |            |      |          |        |             |
| Painful ulcer                           |            |      |          |        |             |

| <b>PSYCHOLOGICAL HEALTH</b>         |            |      |          |        |             |
|-------------------------------------|------------|------|----------|--------|-------------|
| <b>Domains of Indian life style</b> | No problem | Mild | Moderate | Severe | Most severe |
| Do you have sense of failure        |            |      |          |        |             |

|                                                 |  |  |  |  |  |
|-------------------------------------------------|--|--|--|--|--|
| Fear something bad might happen to you          |  |  |  |  |  |
| Discouraged/tensed about the future             |  |  |  |  |  |
| Feeling neglected by friends and family members |  |  |  |  |  |
| Feeling lonely                                  |  |  |  |  |  |
| Feeling tensed about your disease               |  |  |  |  |  |
| Difficulty in concentration & memory            |  |  |  |  |  |

| <b>SOCIAL PARTICIPATION</b>                                                |            |      |          |        |             |
|----------------------------------------------------------------------------|------------|------|----------|--------|-------------|
| <b>Domains of Indian life style</b>                                        | No problem | Mild | Moderate | Severe | Most severe |
| Has your life style changed after getting the disease                      |            |      |          |        |             |
| Do you have problem in moving around freely without feeling self-conscious |            |      |          |        |             |
| Do you have problem in approaching people in the community                 |            |      |          |        |             |
| Do you have problem joining in social activities/get together              |            |      |          |        |             |
| How much problem you have faced because of ill health                      |            |      |          |        |             |

**Instructions for Scoring and analysis:**

The scoring of each question is as follows:

|                                   |   |   |
|-----------------------------------|---|---|
| No problem                        | : | 4 |
| Mild                              | : | 3 |
| Moderate                          | : | 2 |
| Severe                            | : | 1 |
| Most severe                       | : | 0 |
| Question unanswered, not relevant | : | 0 |

The overall QoL response is

$$\text{Overall QoL} = \text{Total score} / (4 \times \text{number of questions answered}) \times 100$$

The domain score is

$$\text{Domain score} = \text{Total score on domain} / (4 \times \text{number of questions answered in the domain}) \times 100$$

Note: The higher score indicates better quality of life. All questions are not relevant to every patient. So percentage analysis done based on the questions answered in each domain.

© 2009 Institute of Applied Dermatology, Kasaragod, Kerala, India [www.iad.org.in](http://www.iad.org.in)
